1 **Master manipulation continued: feminizing *Wolbachia***  
2 **endosymbiont distorts sex chromosome inheritance**

3  
4 **Short title:** *Wolbachia* distort sex chromosome inheritance

5  
6 **Daisuke Kageyama<sup>a,1</sup>, Mizuki Ohno<sup>b</sup>, Tatsushi Sasaki<sup>b</sup>, Atsuo Yoshido<sup>b</sup>,**  
7 **Tatsuro Konagaya<sup>c</sup>, Akiya Jouraku<sup>a</sup>, Seigo Kuwazaki<sup>a</sup>, Hiroyuki Kanamori<sup>d</sup>,**  
8 **Yuichi Katayose<sup>d</sup>, Satoko Narita<sup>a,e</sup>, Mai Miyata<sup>f</sup>, Markus Riegler<sup>g</sup>, and Ken**  
9 **Sahara<sup>b,1</sup>**

10  
11 <sup>a</sup>Institute of Agrobiological Sciences, National Agriculture and Food Research  
12 Organization, 1-2, Owashi, Tsukuba, Ibaraki 305-0854, Japan; <sup>b</sup>Laboratory of Applied  
13 Entomology, Faculty of Agriculture, Iwate University, 3-18-8, Ueda, Morioka 020-8550,  
14 Japan; <sup>c</sup>Graduate School of Science, Kyoto University, Kitashirakawa Oiwake-cho,  
15 Sakyo-ku, Kyoto 606-8502, Japan; <sup>d</sup>Institute of Crop Science, National Agriculture and  
16 Food Research Organization, 1-2, Owashi, Tsukuba, Ibaraki 305-0854, Japan;  
17 <sup>e</sup>Tsukuba Primate Research Center, National Institute of Biomedical Innovation, Health  
18 and Nutrition, 1-1, Hachimandai, Tsukuba, Ibaraki 305-0843, Japan; <sup>f</sup>Graduate School  
19 of Horticulture, Chiba University, Matsudo 648, Matsudo, Chiba 271-8510, Japan; and  
20 <sup>g</sup>Hawkesbury Institute for the Environment, Western Sydney University, Locked Bag  
21 1797, Penrith, New South Wales 2751, Australia

22  
23 Author contributions: D.K. and K.S. designed the research; D.K., M.O., T.S., A.Y.,  
24 T.K., S.K., H.K., Y.K., S.N., M.M., M.R., and K.S. performed the research; D.K.,  
25 A.J., and K.S. analyzed the data; and D.K., M.R., and K.S. wrote the paper.

26 The authors declare no conflict of interest.

27 <sup>1</sup>Correspondence should be addressed: kagymad@affrc.go.jp (D.K.),  
28 sahara@iwate-u.ac.jp (K.S.)

29  
30 **Keywords:** butterfly, feminization, meiotic drive, sex chromosome, sex  
31 determination, *Wolbachia*

32 **Abstract**

33 *Wolbachia* is a maternally inherited ubiquitous endosymbiotic bacterium of  
34 arthropods that displays a diverse repertoire of host reproductive manipulations.  
35 For the first time, we demonstrate that *Wolbachia* manipulates sex chromosome  
36 inheritance in a sexually reproducing insect. *Eurema mandarina* butterfly  
37 females on Tanegashima Island, Japan, are infected with the *wFem Wolbachia*  
38 strain and produce all-female offspring, while antibiotic treatment results in male  
39 offspring. Fluorescence *in situ* hybridization (FISH) revealed that *wFem*-positive  
40 and *wFem*-negative females have ZO and WZ sex chromosome sets,  
41 respectively, demonstrating the predicted loss of the W chromosome from  
42 *wFem*-infected lineages. Genomic quantitative polymerase chain reaction  
43 (qPCR) analysis showed that *wFem*-positive females lay only ZO eggs that carry  
44 a paternal Z, whereas females from lineages that are naturally *wFem*-negative  
45 lay both WZ and ZZ eggs. In contrast, antibiotic treatment of adult *wFem* females  
46 resulted in the production of ZO and ZZ eggs, suggesting that this *Wolbachia*  
47 strain can induce meiotic drive. Moreover, most male offspring produced by  
48 antibiotic-treated *wFem* females had a ZZ karyotype, implying reduced survival  
49 of ZO individuals in the absence of feminizing effects of *Wolbachia*. Antibiotic  
50 treatment of *wFem*-infected larvae induced male-specific splicing of the  
51 *doublesex* (*dsx*) gene transcript, causing an intersex phenotype. Thus, the loss  
52 of the female-determining W chromosome in ZO individuals is functionally  
53 compensated by *Wolbachia* feminization. We discuss how *Wolbachia* may  
54 manipulate oogenesis to cause meiotic drive and that *Wolbachia* may have  
55 acquired this coordinated dual mode of reproductive manipulation first by the  
56 evolution of feminization and then cytoplasmically induced meiotic drive.

57 **Significance Statement**

58 Genomes are vulnerable to selfish genetic elements that enhance their own  
59 transmission often at the expense of host fitness. These include cytoplasmic  
60 elements such as endosymbiotic bacteria that cause feminization, male-killing,  
61 parthenogenesis and cytoplasmic incompatibility. We demonstrate, for the first  
62 time, that meiotic drive, a phenomena so far seen only for nuclear genetic  
63 elements, can also be caused by the ubiquitous endosymbiotic bacterium  
64 *Wolbachia*. In female butterflies with a ZO sex chromosome constitution,  
65 *Wolbachia* prevents the production of ZZ zygotes. *Wolbachia* also compensates  
66 for the female-determining function of the W chromosome lost from infected  
67 lineages, thereby causing the production of all-female progeny. Our findings  
68 highlight that cytoplasmic elements play an important role in sex determination  
69 systems and sex chromosome evolution.

70 **Introduction**

71 Genomes of sexually reproducing organisms are exposed to genetic conflicts.  
72 For example, some genes bias reproduction towards male offspring while other  
73 genes within the same genome may favor reproduction of more daughters.  
74 Selfish genetic elements (SGEs), such as meiotic drivers, cytoplasmic sex ratio  
75 distorters and transposons, are extreme examples, which enhance their own  
76 transmission often at the expense of their hosts' fitness (1, 2). There is growing  
77 evidence that SGEs, and the resulting genetic conflict, trigger important  
78 evolutionary change and innovation in eukaryotes (2).

79 Meiotic drive is a distortion of Mendelian inheritance as it leads to the  
80 more frequent inheritance of one copy of a gene than the expected 50% (3, 4). A  
81 meiotic drive factor that sits on a sex chromosome biases the sex ratio. For  
82 example, X chromosome drive and Y chromosome drive in flies (Diptera), result  
83 in female-biased and male-biased sex ratios, respectively (4). In  
84 male-heterogametic species, meiotic drive factors are expected to be encoded in  
85 the nuclear genome. In female-heterogametic species, however, W  
86 chromosome and cytoplasm behave as a single linkage group and thus W  
87 chromosome drive can theoretically also be caused by cytoplasmic elements.  
88 Although this possibility has previously been proposed (5, 6), lack of empirical  
89 evidence questions whether it is mechanistically possible for cytoplasmic  
90 elements to cause meiotic drive.

91 *Wolbachia pipientis* (Alphaproteobacteria), a bacterium simply referred  
92 to as *Wolbachia*, attracts significant interest in evolutionary and developmental  
93 biology but also from applied perspectives such as pest management because it  
94 can manipulate reproduction of arthropods in various ways such as cytoplasmic  
95 incompatibility, parthenogenesis induction, feminization and male-killing (7).  
96 Here we demonstrate for the first time that meiotic drive caused by *Wolbachia*  
97 constitutes the underlying mechanism of all-female production in the butterfly  
98 *Eurema mandarina*. In most populations, *E. mandarina* is infected with the  
99 cytoplasmic-incompatibility (CI)-inducing *Wolbachia* strain *wCI* at a high  
100 prevalence of close to 100%. Hiroki et al. (8, 9) first reported an all-female  
101 production in *E. mandarina* (then known as *Eurema hecabe* yellow type), which

102 was considered to be due to the feminization of genetic males (ZZ) by  
103 co-infections with the *Wolbachia* strain *wFem* (hereafter we refer to this double  
104 infection status as CF and single infection with *wCI* as C). Three observations  
105 about CF lineages supported this view, i.e., (a) antibiotic treatment of adult  
106 females led to production of all-male offspring (8), (b) antibiotic treatment of  
107 larvae resulted in intersexual adult phenotype (10) and (c) females did not have  
108 the W chromatin body (8, 10). However, Kern et al. (11) challenged this notion by  
109 demonstrating that CF females have only one Z chromosome and that this Z  
110 chromosome always derived from their fathers. Therefore, two hypotheses were  
111 formulated, namely that the CF females have either a ZO or a W'Z sex  
112 chromosome set (whereby W' cannot be visualized in W chromatin assays and  
113 does not have a female-determining function), and that meiotic drive occurs in  
114 CF lineages due to *Wolbachia* or another factor.

115 In a multifaceted approach, by combining chromosome FISH, genome  
116 sequencing, quantitative PCR, reverse transcription PCR and antibiotic  
117 treatment, we have tested these hypotheses and revealed that *Wolbachia* is the  
118 cause for both the meiotic drive and the feminization of ZO individuals which  
119 would otherwise be determined as males in the absence of *Wolbachia*. These  
120 results highlight that cytoplasmic elements can have profound effects on  
121 oogenesis, sex chromosome inheritance and sex determination – fundamental  
122 biological processes of eukaryotes.

123

## 124 **Results**

### 125 **All-female-producing CF females have a ZO karyotype**

126 We performed FISH on *E. mandarina* chromosomes prepared from CF females,  
127 C females, and C males collected on Tanegashima Island (Fig. S1). In the mitotic  
128 complement of C females, which harbor a  $2n = 62$  karyotype, genomic probes  
129 highlighted the W chromosome, with scattered signals on the other  
130 chromosomes (Fig. 1A; see Materials and Methods for technical details). A  
131 probe for the Z-linked gene *Kettin* (*Ket*) identified the single Z chromosome in C  
132 females (Fig. 1A), and also hybridized to the Z chromosome paired with the W  
133 chromosome in pachytene bivalents (Fig. 1J). The *Ket* probe identified two Z

134 chromosomes in the mitotic complement of C males (Fig. 1B;  $2n = 62$ ). No  
135 painted W chromosome was observed in interphase nuclei (Fig. 1H, I), the  
136 mitotic complement (Fig. 1C) and pachytene complement (Fig. 1L) of CF  
137 females, but the *Ket* signal appeared on the single Z chromosome in the mitotic  
138 complement (Fig. 1C) and Z univalent in the pachytene complement (Fig. 1L).  
139 Based on the relative read counts homologous to *Bombyx mori* Z-linked and  
140 autosomal genes in females and males, our genome sequencing data support  
141 the notion that CF and C females have one Z chromosome (Figs. 1M–O; Table  
142 S1), which is consistent with genomic qPCR data based on two loci,  
143 *Triosephosphate isomerase (Tpi)* and *Ket*, relative to the autosomal gene *EF-1 $\alpha$*   
144 (11). Thus, our results directly reveal the sex chromosome constitution of C  
145 females, C males, and CF females as WZ, ZZ, and ZO, respectively. This  
146 conclusion disproves previous interpretations based on the W-body diagnosis  
147 alone that C and CF females possess WZ and ZZ sex chromosome constitutions,  
148 respectively (8, 10).

149

#### 150 **CF females deposit exclusively ZO eggs**

151 Previously, the high number of survivors among the offspring of CF females  
152 (compared with those of C females) has been the only reason to exclude  
153 male-killing during embryonic or later stages as a possible reason for this  
154 outcome (10–12). We performed real-time genomic qPCR (to detect Z-linked *Tpi*  
155 or *Ket* relative to autosomal *EF-1 $\alpha$* ) on individual fertilized eggs, and found that C  
156 females oviposited eggs with either one or two Z chromosomes at nearly equal  
157 frequencies (Fig. 2A, left; Fig. S2). In contrast, all eggs deposited by CF females  
158 were single Z carriers (Fig. 2A, middle; Fig. S2). These findings indicate that the  
159 progeny of CF females are exclusively ZO individuals, supporting the view that  
160 meiotic drive occurs in CF females.

161

#### 162 ***Wolbachia* causes the exclusive production of ZO eggs**

163 To abolish the effects of *Wolbachia*, tetracycline (tet) was administered to adult  
164 CF females previously inseminated by antibiotic-treated male offspring of C  
165 females. The Z-linked gene dose of eggs produced by these tet-treated females

166 ranged from approximately 0.5–1.0, indicating that some eggs are ZO and  
167 others are ZZ (Fig. 2A, right; Fig. S2). This suggests that the *Wolbachia* strain  
168 *wFem* in CF females causes the exclusive production of ZO embryos. Therefore,  
169 our finding is the first empirical evidence that in a female-heterogametic species  
170 meiotic drive can also be caused by cytoplasmic elements (5, 6). Furthermore,  
171 *Wolbachia*-like structures were observed near the chromosomes in CF females  
172 while less apparent in C females and C males, and this may represent different  
173 tropism and function of *wFem* when contrasted with *wCl* (Fig. 1C).

174         Sixty-nine adults (15 females and 54 males) were obtained from  
175 offspring produced by five tet-treated adult CF females (Fig. 2B). Three of these  
176 tet-treated females produced only male offspring. Exclusive production of males  
177 was previously observed in tet-treated *E. mandarina* females derived from a  
178 different population on Okinawa-jima Island, Okinawa Prefecture, Japan (8). In  
179 this study, we obtained 15 female offspring from two broods in the first days after  
180 tet treatment; however, the mothers produced more males as the duration of tet  
181 treatment increased, and eventually produced only males. Examination of the  
182 Z-linked gene dose of these offspring by genomic qPCR showed that the  
183 females had one Z chromosome, whereas almost all of the males had two Z  
184 chromosomes (Fig. 2C). The nucleotide sequences of the introns of the *Tpi* gene  
185 strongly suggested that, in brood 19-1, all females ( $n = 12$ ) were hemizygous  
186 and nine out of 10 males were heterozygous (Fig. 2C; Table S2). Curiously, one  
187 male (21m) that exhibited the lowest gene dose of *Ket* (0.588) appeared to be  
188 hemizygous (Fig. 2C). These results suggest that the emerged females had a  
189 ZO sex chromosome constitution, whereas most males had a ZZ sex  
190 chromosome constitution, with one exception (21m) of either ZO or ZZ' (Z'  
191 represents partial deletion/mutation in Z). These results also demonstrate that, in  
192 principle, tet-treated adult CF females can oviposit eggs with either a ZO or ZZ  
193 sex chromosome constitutions (Fig. 2A, right). However, ZO individuals appear  
194 to have zero or very low survival rates because few emerge as adults.

195

#### 196 **Involvement of *Wolbachia* in the sex determination of *Eurema mandarina***

197 Next, we fed CF larvae a tet-containing diet. As previously observed (10), all

198 individuals treated in this way developed an intersex phenotype at the adult  
199 stage, typically represented with male-like wing color and incomplete  
200 male-specific structure on wing surface (Fig. 3E and H; Fig. S3). The qPCR  
201 assay to assess the Z-linked gene dose revealed that these intersexes ( $n = 23$ )  
202 had just one Z chromosome (Fig. 3I), and therefore a ZO genotype. Because  
203 these ZO individuals were destined to develop as females without tet treatment,  
204 *wFem* is likely to be responsible for female sex determination.

205 Further evidence in support of this idea was obtained by examining the  
206 sex-specific splicing products of *dsx* (Fig. S4), a widely conserved gene  
207 responsible for sexual differentiation (13). Similar to *B. mori* (14), C females  
208 exhibited a female-specific splicing product of *E. mandarina dsx* (*Emdsx<sup>F</sup>*),  
209 whereas C males a male-specific splicing product of *E. mandarina dsx* (*Emdsx<sup>M</sup>*;  
210 Lanes 1 and 2 in Fig. 3A, respectively; Fig. 3B). Similarly to C females, CF  
211 females exhibited exclusive expression of *Emdsx<sup>F</sup>* (Lanes 3 and 4 in Fig. 3A; Fig  
212 3B). Intersexual butterflies, generated by feeding the larval offspring of CF  
213 females a tet-containing larval diet, expressed both *Emdsx<sup>F</sup>* and *Emdsx<sup>M</sup>* (Lanes  
214 5 and 6 in Fig. 3A; Table 1).

215

## 216 Discussion

### 217 Contrasting two potential underlying mechanisms of cytoplasmically 218 induced female meiotic drive: Selection of gametes lacking sex 219 chromosomes or elimination of the maternal sex chromosomes?

220 Exclusive production of ZO embryos by CF females suggests that the  
221 cytoplasmically induced meiotic drive effect of *wFem* occurs before oviposition.  
222 However, its underlying mechanism remains unclear. Parthenogenesis can be  
223 excluded because the Z chromosomes are transmitted from their fathers (11).  
224 We believe that two mutually exclusive hypotheses can account for the  
225 phenomena observed in *E. mandarina* (Fig. 4). The first assumes that, in CF  
226 females, an O gamete that does neither bear a maternal Z chromosome, nor any  
227 sex chromosome in general, is always selected to become an egg pronucleus  
228 (meiotic drive *sensu stricto*) (Fig. 4A) (15). The second assumes that meiosis  
229 itself is normal, and that maternal Z chromosomes, or sex chromosomes in



230 general, are selectively eliminated from Z-bearing gametes during, or possibly  
231 after, meiosis (Fig. 4B). Based on the terminology of meiotic drive established in  
232 the population genetics literature, the second scenario can also be referred to as  
233 meiotic drive (cf. male meiotic drive in Diptera and *Mus musculus* (3, 4), in which  
234 gametes that do not carry a driver are selectively inactivated *after* normal  
235 meiosis). At present, it is unclear which of the two hypotheses (meiotic drive  
236 *sensu stricto* or elimination of the maternal Z at a later stage) is more plausible.  
237 However, it is noteworthy that, in the moth *Abraxas grossulariata*, a matriline  
238 consisting of putative ZO females produced only females or a great excess of  
239 females, and the underlying mechanism was considered to be the selective  
240 elimination of Z chromosomes (16–19). In *A. grossulariata*, the presence of  
241 cytoplasmic bacteria such as *Wolbachia* has not yet been examined. However, if  
242 we assume that the elimination of the maternal Z chromosome is also the  
243 mechanism of the female meiotic drive in *E. mandarina*, the exceptional  
244 individual 21m (Fig. 2C) could be viewed as ZZ', possessing a maternal Z  
245 chromosome that was only partially eliminated by the incomplete action of *wFem*.  
246 It is possible to further speculate that the presence of *wFem* results in the  
247 elimination of sex chromosomes in general (Z or W chromosomes) and,  
248 therefore, the absence of W chromosomes in CF females may also be a direct  
249 effect of *wFem*.

250

### 251 **Feminizing effect of *Wolbachia*: Compensation for W chromosome** 252 **function in ZO individuals?**

253 Generation of intersexes by treating the CF larvae by antibiotics suggests that  
254 ZO individuals are male by default, and that *wFem Wolbachia* overrides sex  
255 determination so that infected individuals develop as females. The assumption  
256 that male sex is default in ZO individuals is congruent with the recent finding in *B.*  
257 *mori* where a W chromosome-located *Fem* piRNA is responsible for female sex  
258 determination (20). The morphologically and functionally complete female  
259 phenotype of CF individuals (ZO) suggests that *wFem* compensates for the loss  
260 of the female-determining function of the W chromosome in *E. mandarina*.

261 Reduced survival of ZO individuals resulted from antibiotic treatment on

262 either ZO adults or larvae may suggest an improper dosage compensation in ZO  
263 males. Improper dosage compensation was also suggested to be the cause of  
264 male- and female-specific lethality in *Wolbachia*-infected and cured lines of  
265 *Ostrinia* moths (21–24).

266

### 267 **How did the coordinated dual effects of *Wolbachia* evolve?**

268 In haplodiploid parasitoid wasps, *Wolbachia* and *Cardinium* induce thelytokous  
269 parthenogenesis in a two-step mechanism, comprising diploidization of the  
270 unfertilized egg followed by feminization (25, 26). Similarly, we determined that  
271 *wFem* causes meiotic drive and feminization in *E. mandarina* in two steps (Fig.  
272 5A).

273         Next, we speculate about the potential evolutionary scenario that led to  
274 the appearance of both effects (Fig. 5B). A WZ female *Eurema* butterfly may  
275 have acquired an ancestor of *wFem* that exerted a feminizing effect on ZZ males.  
276 The feminizing effect was lethal to ZZ individuals because of improper dosage  
277 compensation, as evident in *Ostrinia* moths (23, 24). This effect may have been  
278 similar to a male-killing phenotype (27, 28), but it was redundant in WZ females  
279 where the W chromosome acted as a female determiner (20). Subsequent loss  
280 of the W chromosome, leading to the generation of ZO females, can then be  
281 reasonably assumed due to it becoming redundant. Similarly, in *Ostrinia* moths,  
282 a female-determining function is thought to have been lost from the W  
283 chromosome in *Wolbachia*-infected matriline (22). Spontaneous loss of a  
284 nonfunctional W chromosome may be easier than expected: in a wild silkworm  
285 *Samia cynthia*, the W chromosome does not have a sex-determining function,  
286 and ZO females are frequently obtained by experimental crosses between  
287 subspecies (29). It appears that, in *E. mandarina*, *Wolbachia* may be involved in  
288 the evolution of sex chromosomes in a manner mechanistically different from  
289 that in the woodlouse *Armadillidium vulgare* where *Wolbachia* was involved in  
290 the loss and birth of the W chromosome (30, 31).

291         After the loss of the W chromosome, *Wolbachia* then acquired a novel  
292 function that affected female meiosis and resulted in female meiotic drive. The  
293 order of these events is unlikely to be the other way around: if the appearance of

294 meiotic drive were to precede the loss of the W chromosome, the feminizing or  
295 female-determining function would become unnecessary for *Wolbachia* because  
296 there would be no males. In the short term, female meiotic drive in a  
297 female-heterogametic species represents a great advantage to cytoplasmic  
298 symbionts because all vertically transmitted symbionts gain the opportunity to  
299 survive. However, males are still required for fertilization, and fixation of the  
300 symbionts in the host population will inevitably lead to the extinction of both the  
301 symbionts and the hosts (32). In the long term, suppressors against sex ratio  
302 distortion, as has been observed for the male-killing phenotypes in the butterfly  
303 *Hypolimnas bolina* or a ladybird beetle (33, 34), can be expected to evolve in the  
304 host. However, the evolutionary outcomes of combined meiotic drive and  
305 feminization would be different from that of male-killing, because suppression of  
306 the effects of *Wolbachia* would lead to all-male progeny, resulting in the loss of  
307 the matriline as well as *Wolbachia*. This situation would increase the frequency  
308 of normal WZ females.

309

### 310 **Concluding remarks**

311 In summary, we demonstrated for the first time that the manipulation of sex  
312 chromosome inheritance and cytoplasmically induced meiotic drive can be  
313 added to the repertoire of host manipulations induced by *Wolbachia*. Therefore,  
314 the host effects of this bacterium are far more diverse and profound than  
315 previously appreciated. Disentangling these complex interactions between  
316 insects and *Wolbachia* may provide further exciting discoveries in the areas of  
317 host-parasite interactions, endosymbiosis as well as cell and chromosome  
318 biology in years to come, and perhaps also provide new avenues for pest  
319 population control.

320

### 321 **Materials and Methods**

#### 322 **Insect collection and rearing**

323 Female adults of *E. mandarina* (Lepidoptera: Pieridae) were collected on  
324 Tanegashima Island, Kagoshima, Japan (Fig. S1). In the laboratory, each female  
325 was allowed to lay eggs on fresh leaves of *Lespedeza cuneata* (Fabales:

326 Fabaceae) in a plastic cup with absorbent cotton immersed with 5% honey  
327 solution. The artificial diet for larvae was prepared by mixing leaf powder of  
328 *Albizia julibrissin* (Fabales: Fabaceae) in the custom-made Silkmate  
329 (Nihon-Nosa, Yokohama, Japan) devoid of mulberry leaves. Insects were reared  
330 under the 16 h/ 8 h light /dark photoperiod at 25°C.

331

### 332 **Antibiotic treatment**

333 We performed antibiotic treatment on two different stages (larval stage and adult  
334 stage) of *E. mandarina*. For larval antibiotic treatment, larvae were fed with the  
335 artificial diet (shown above) containing 0.05% tetracycline hydrochloride (tet).  
336 For adult antibiotic treatment, female adults were fed with 5% honey solution  
337 containing 0.1% tet. Specifically, CF females were mated to antibiotic-treated  
338 male offspring of C females. Antibiotic treatment of these males was performed  
339 in the larval stage and prevented CI in the crossing. After mating, each CF  
340 female was allowed to lay eggs on fresh leaves of *L. cuneata* in a plastic cup  
341 with absorbent cotton immersed with 5% honey solution containing 0.1% tet.  
342 Fresh leaves of *L. cuneata* and cotton with tet-containing honey solution were  
343 exchanged daily.

344

### 345 **Diagnosis of *Wolbachia* strains**

346 To diagnose *Wolbachia* strains in *E. mandarina*, several legs of each adult were  
347 homogenized in STE buffer (10 mM Tris-HCl (pH 8.0), 1 mM EDTA (pH 8.0), 150  
348 mM NaCl) and incubated at 56°C for 30 min followed by 92°C for 5 min. After  
349 centrifugation at 15,000 rpm for 2 min, the supernatant was used for polymerase  
350 chain reaction (PCR) using different primer pairs. The primer pair wsp81F (5'-  
351 TGGTCCAATAAGTGATGAAGAAAC-3') and wsp691R (5'-  
352 AAAAATTAACGCTACTCCA-3') amplifies a ca. 610-bp fragment of the  
353 *Wolbachia* *wsp* gene (35). The primer pair wsp81F and HecCIR (5'-  
354 ACTAACGTCGTTTTTGTTTAG-3') amplifies specifically a 232-bp fragment of  
355 the *wsp* gene of *wCI*, while the primer pair HecFemF (5'-  
356 TTACTIONACAATTGGCTAAAGAT-3') and the wsp691R amplifies specifically a  
357 398-bp fragment of *wsp* gene of *wFem* (9).

358

### 359 **Whole genome sequencing and de novo assembly**

360 We performed whole genome sequencing for three types of *E. mandarina*  
361 individuals (CF females, C females and C males) collected on Tanegashima  
362 Island, Japan (Fig. S1). Six genomic DNA libraries (two libraries for each sample  
363 type derived from two individuals) were constructed following manufacturer's  
364 instructions (<http://www.illumina.com>). The average insert size of the libraries  
365 was approximately 350 bp and each library was multiplexed using a single  
366 indexing protocol. The genomic DNA libraries were sequenced by Illumina  
367 MiSeq using MiSeq Reagent Kit v3 (600-cycle) (Illumina, San Diego, CA).  
368 Generated raw reads (8.31 Gb, 5.34 Gb, and 6.94 Gb for CF females, C females  
369 and C males, respectively) were filtered by Trimmomatic (36) and then mapped  
370 to the complete genome of *Wolbachia* strain wPip (GenBank: NC\_010981.1) by  
371 Bowtie2 (37). Mapped reads were discarded and then remaining reads of the  
372 three samples were merged and de novo assembled by SGA assembler (38).  
373 Generated genome contig sequences were used for further analysis.

374

### 375 **Analysis of mapped read counts on chromosomes**

376 To verify that CF and C females have one Z chromosome, we compared  
377 normalized mapped read counts of the three samples on Z chromosomes and  
378 remaining chromosomes. The filtered reads of each sample were mapped to the  
379 genome contigs by Bowtie2 (only concordantly and uniquely mapped reads were  
380 counted) and then normalized mapped read count of each sample on each  
381 contig was calculated based on the ratio of the number of total mapped reads  
382 between the three samples. Nucleotide sequences of relatively long genome  
383 contigs (length is 2 kb or more) with enough coverage (20 or more mapped  
384 reads) were extracted and compared with the gene set A of *B. mori* (39) by  
385 blastx search (cutoff e-value is  $1e^{-50}$ ). Genome contigs with blastx hits were  
386 extracted and classified into 28 chromosomes based on the location of the  
387 homologous *B. mori* genes. For each chromosome, the average number of  
388 relative normalized mapped read counts was calculated for each sample (the  
389 number of C males was normalized to 1) using the normalized mapped read

390 counts in the classified genome contigs, respectively.

391

### 392 **Sanger sequencing**

393 To genotype Z chromosomes, a highly variable intron of Z-linked  
394 triosephosphate isomerase (*Tpi*) gene was PCR amplified using the primers, 5'–  
395 GGTCCTCTGAAAGGAGAACCACTTT–3' and 5'–  
396 CACAACATTTGCCAGTTGTTGCAA–3', located in coding regions (40). The  
397 PCR products were treated with ExoSAP-IT® (Affymetrix Inc., Santa Clara, CA)  
398 and subjected to direct sequencing at Eurofins Genomics K.K. (Tokyo, Japan).  
399 No indels or SNPs were observed in sequence chromatograms of females;  
400 some males were heterozygous due to detected double peaks and shifts of  
401 sequence reads. By sequencing from both sides, it was possible to obtain the  
402 genotypes of males and females (Fig. 2C).

403

### 404 **FISH analysis**

405 In most lepidopteran species a heterochromatic body, that is rather conspicuous,  
406 is exclusively found in female polyploid nuclei. Since W derived-BAC as well as  
407 genomic probes have highlighted the W chromosomes and heterochromatin  
408 bodies in *B. mori* (41, 42), there is no doubt that the bodies consist of the W  
409 chromosomes. The diagnosis however remains unreliable if a species of interest  
410 carries a W–autosomal translocation and/or partial deletion of the W (43, 44).  
411 Hiroki et al. (8) as well as Narita et al. (10) relied on the W-body diagnosis for C  
412 and CF females and concluded that they have WZ and ZZ sex chromosome  
413 constitutions, respectively. However, Kern et al. (11) has recently found that, on  
414 the basis of genomic qPCR designed to amplify Z-linked gene sequences (*Tpi*  
415 and *Ket*) relative to an autosomal gene (*EF-1 $\alpha$* ), both CF and C females have  
416 only one Z chromosome while males have two Z chromosomes. This finding  
417 rejected the previous conclusion that the sex chromosome constitution of CF  
418 females is ZZ (8, 10) but was inconclusive about whether CF females have a ZO  
419 or ZW' system (with W' as a modified W that has lost the feminization function  
420 and cannot be detected by the W-body assay). Hence we carried out more  
421 extensive chromosome analysis (other than just the W-body) to prove whether

422 CF females carry the *W* or not.

423 In Lepidoptera, the *W* chromosome can be highlighted by FISH using  
424 probes prepared from whole genomic DNA of males or females. The reason for  
425 the *W* chromosome specificity is considered to be due to the numerous repetitive  
426 short sequences occupying the *W* chromosome, which is then prone to be  
427 hybridized by random sequences. Genomic probes also paint repetitive regions  
428 scattered across other chromosomes, albeit at a lower density (autosomes and  
429 *Z* chromosome). Here we made mitotic and pachytene chromosome  
430 preparations from wing discs and gonads, respectively, in the last instar larvae of  
431 *C* and *CF* individuals of *E. mandarina* (see (45) for details). Genomic DNA was  
432 extracted from tet-treated *C* female larvae. Insect telomeric repeats were  
433 amplified by non-template PCR (46). *Kettin* gene fragments were amplified from  
434 adult cDNA synthesized by PrimeScript™ RT reagent Kit (TaKaRa, Otsu,  
435 Japan) and cloned by TOPO® TA Cloning® Kit (Thermo Fisher Scientific,  
436 Waltham, MA). We used 4 pairs of primers, Em\_kettin\_F1: 5'–  
437 AGGTAATCCAACGCCAGTCG–3' and Em\_kettin\_R1: 5'–  
438 TGCTTGCCCTAAGGCATTGT–3', Em\_kettin\_F2: 5'–  
439 ACAATGCCTTAGGGCAAGCA–3' and Em\_kettin\_R2: 5'–  
440 TGGGCAAAGCCTCTTCATGT–3', Em\_kettin\_F3: 5'–  
441 AGATTCCGCACTACGCATGA–3' and Em\_kettin\_R3: 5'–  
442 TAAATTGTGGTGGGACGGCA–3', Em\_kettin\_F5: 5'–  
443 ACATGAAGAGGCTTTGCCCA–3' and Em\_kettin\_R5: 5'–  
444 TCATGCGTAGTGCGGAATCT–3', for PCR amplification with 94°C for 5 min  
445 followed by 35 cycles of 94°C for 30 s, 60°C for 30 s and 72°C for 3 min finalized  
446 by 72°C for 10 min. Probe labeling was done by using the Nick Translation Kit  
447 (Abbott Molecular, Des Plaines, IL). We selected Green-dUTP, Orange-dUTP  
448 (Abbott Molecular Inc.) and Cy5-dUTP (GE Healthcare Japan, Tokyo)  
449 fluorochromes for genomic DNA, *Kettin* and insect telomeric repeat (TTAGG)*n*  
450 probes respectively. Hybridizations were carried out according to protocols  
451 described elsewhere (45). Signal and chromosome images were captured with a  
452 DFC350FX CCD camera mounted on a DM 6000B microscope (Leica  
453 Microsystems Japan, Tokyo) and processed with Adobe Photoshop CS2. We

454 applied green, red and yellow pseudocolors to signals from Green, Orange and  
455 Cy5 respectively.

456

#### 457 **Quantitative polymerase chain reaction (qPCR)**

458 Eggs of mated females were sampled 48 h after the oviposition and stored at –  
459 80°C until DNA extraction. Eggs were individually subjected to DNA extraction  
460 using DNeasy® Blood & Tissue Kit (Qiagen, Tokyo, Japan). Real-time  
461 fluorescence detection quantitative PCR (qPCR) was performed using SYBR  
462 Green and a LightCycler® 480 System (Roche Diagnostics K.K., Tokyo, Japan).  
463 Z-linked *Tpi* was amplified using TPI-F (5'–GGCCTCAAGGTCATTGCCTGT–3')  
464 and TPI-R (5'–ACACGACCTCCTCGGTTTTACC–3'), Z-linked *Ket* was amplified  
465 using Ket-F (5'–TCAGTTAAGGCTATTAACGCTCTG–3') and Ket-R (5'–  
466 ATACTACCTTTTGC GGTTACTGTC–3'), and autosomal *EF-1α* was amplified  
467 using EF-1F (5'–AAATCGGTGGTATCGGTACAGTGC–3') and EF-1R (5'–  
468 ACAACAATGGTACCAGGCTTGAGG–3') (11). For each qPCR, a standard  
469 dilution series of PCR products ( $10^8$ ,  $10^7$ ,  $10^6$ ,  $10^5$ ,  $10^4$  and  $10^3$  copies per  
470 microliter) was included in order to estimate the absolute copy numbers of the  
471 target sequence in the samples. To prepare standard samples, PCR products  
472 were gel-excised and purified by Wizard® SV (Promega). Copy numbers of the  
473 standard samples were estimated by the concentration measured by a  
474 spectrophotometer, considering that the molecular weight of a nucleotide is 309  
475 g/mol. For each qPCR, two replicates were performed that delivered similar  
476 results. All qPCRs were performed using a temperature profile of 40 cycles of  
477 95°C for 5 s, 60°C for 10 s, and 72°C for 10 s. The qPCR data were analyzed by  
478 the Absolute Quantification analysis using the Second Derivative Maximum  
479 method implemented in the LightCycler® 480 Instrument Operator Software  
480 Version 1.5 (Roche).

481

#### 482 **RT-PCR**

483 RNA was extracted from adult abdomens that were stored at -80°C using  
484 RNeasy® Mini Kit (Qiagen, Tokyo, Japan). The cDNA synthesized by using  
485 Superscript™ III (Invitrogen) and Oligo(dT) was used as a template for RT-PCR.



486 A partial sequence of *dsx* which contains alternative splicing sites was amplified  
487 using a primer pair, E520F (5'-GCAACGACCTCGACGAGGCTTCGCGGA-3')  
488 and EhdsxR4 (5'-AGGGGCAGCCAGTGCGACGCGTACTCC-3') and a  
489 temperature profile of 94°C for 2 min, 30 cycles of 94°C for 1 min, 57°C for 1 min  
490 and 72°C for 1 min 30 s, followed by 72°C for 7 min. The sequences of seven  
491 *dsx<sup>F</sup>* isoforms and a *dsx<sup>M</sup>* isoform were deposited in DDBJ/EMBL/Genbank  
492 (LC215389-LC215396).

493

494

#### 495 **ACKNOWLEDGMENTS**

496 We thank Isao Kobayashi for help in collecting butterflies and Ranjit Kumar  
497 Sahoo for stimulating discussion. This study was financially supported by  
498 KAKENHI (No. 16K08106) to D.K. and K.S. and KAKENHI (No. 16H05050) to  
499 K.S.

500 **References**

- 501 1. Burt A, Trivers R (2006) *Genes in Conflict: the Biology of Selfish Genetic*  
502 *Elements* (Harvard University Press, Cambridge, MA).
- 503 2. Werren JH (2011) Selfish genetic elements, genetic conflict, and  
504 evolutionary innovation. *Proc Natl Acad Sci U S A* 108(Suppl 2):10863–  
505 10870.
- 506 3. Jaenike J (2001) Sex chromosome meiotic drive. *Annu Rev Ecol Syst*  
507 32:25–49.
- 508 4. Lindholm AK, et al. (2016) The ecology and evolutionary dynamics of  
509 meiotic drive. *Trends Ecol Evol* 31(4):315–326.
- 510 5. Hurst LD (1993) The incidences mechanisms and evolution of cytoplasmic  
511 sex ratio distorters in animals. *Biol Rev* 68(1):121–194.
- 512 6. Beukeboom LW, Perrin N (2014) *The Evolution of Sex Determination*  
513 (Oxford University Press).
- 514 7. Werren JH, Baldo L, Clark ME (2008) *Wolbachia*: master manipulators of  
515 invertebrate biology. *Nat Rev Microbiol* 6:741–751.
- 516 8. Hiroki M, Kato Y, Kamito T, Miura K (2002) Feminization of genetic males  
517 by a symbiotic bacterium in a butterfly, *Eurema hecabe* (Lepidoptera:  
518 Pieridae). *Naturwissenschaften* 89(4):167–170.
- 519 9. Hiroki M, Tagami Y, Miura K, Kato Y (2004) Multiple infection with  
520 *Wolbachia* inducing different reproductive manipulations in the butterfly  
521 *Eurema hecabe*. *Proc R Soc Lond B* 271(1549):1751–1755.
- 522 10. Narita S, Kageyama D, Nomura M, Fukatsu T (2007) Unexpected  
523 mechanism of symbiont-induced reversal of insect sex: feminizing  
524 *Wolbachia* continuously acts on the butterfly *Eurema hecabe* during larval  
525 development. *Appl Environ Microbiol* 73(13):4332–4341.
- 526 11. Kern P, Cook JM, Kageyama D, Riegler M (2015) Double trouble:  
527 combined action of meiotic drive and *Wolbachia* feminization in *Eurema*  
528 butterflies. *Biol Lett* 11(5):20150095.
- 529 12. Narita S, Nomura M, Kageyama D (2007) Naturally occurring single and  
530 double infection with *Wolbachia* strains in the butterfly *Eurema hecabe*:  
531 transmission efficiencies and population density dynamics of each

- 532 *Wolbachia* strain. *FEMS Microbiol Ecol* 61(2):235–245.
- 533 13. Bopp D, Saccone G, Beye M (2014) Sex determination in insects:  
534 Variations on a common theme. *Sex Dev* 8(1–3):20–28.
- 535 14. Ohbayashi F, Suzuki MG, Mita K, Okano K, Shimada T (2001) A  
536 homologue of the *Drosophila doublesex* gene is transcribed into  
537 sex-specific mRNA isoforms in the silkworm, *Bombyx mori*. *Comp*  
538 *Biochem Physiol - B Biochem Mol Biol* 128(1):145–158.
- 539 15. Pardo-Manuel De Villena F, Sapienza C (2001) Nonrandom segregation  
540 during meiosis: The unfairness of females. *Mamm Genome* 12(5):331–  
541 339.
- 542 16. Doncaster L (1913) On an inherited tendency to produce purely female  
543 families in *Abraxas grossulariata*, and its relation to an abnormal  
544 chromosome number. *J Genet* 3(1):1–10.
- 545 17. Doncaster L (1914) On the relations between chromosomes, sex-limited  
546 transmission and sex determination in *Abraxas grossulariata*. *J Genet*  
547 4(1):1–21.
- 548 18. Doncaster L (1915) The Relation between Chromosomes and  
549 Sex-determination in “*Abraxas grossulariata*.” *Nature* 95:395.
- 550 19. Doncaster L (1922) Further observations on chromosomes and  
551 sex-determination in *Abraxas grossulariata*. *Q J Microsc Sci* 66(263):397–  
552 406.
- 553 20. Kiuchi T, et al. (2014) A single female-specific piRNA is the primary  
554 determiner of sex in the silkworm. *Nature* 509(7502):4–6.
- 555 21. Kageyama D, Traut W (2004) Opposite sex-specific effects of *Wolbachia*  
556 and interference with the sex determination of its host *Ostrinia scapularis*.  
557 *Proc Biol Sci* 271(1536):251–258.
- 558 22. Sugimoto TN, Ishikawa Y (2012) A male-killing *Wolbachia* carries a  
559 feminizing factor and is associated with degradation of the  
560 sex-determining system of its host. *Biol Lett* 8(3):412–5.
- 561 23. Fukui T, et al. (2015) The endosymbiotic bacterium *Wolbachia* selectively  
562 kills male hosts by targeting the masculinizing gene. *PLoS Pathog*  
563 11(7):1–14.

- 564 24. Sugimoto TN, Kayukawa T, Shinoda T, Ishikawa Y, Tsuchida T (2015)  
565 Misdirection of dosage compensation underlies bidirectional sex-specific  
566 death in *Wolbachia*-infected *Ostrinia scapulalis*. *Insect Biochem Mol Biol*  
567 66:72–76.
- 568 25. Giorgini M, Monti MM, Caprio E, Stouthamer R, Hunter MS (2009)  
569 Feminization and the collapse of haplodiploidy in an asexual parasitoid  
570 wasp harboring the bacterial symbiont *Cardinium*. *Heredity (Edinb)*  
571 102(4):365–371.
- 572 26. Ma W-J, et al. (2015) Diploid males support a two-step mechanism of  
573 endosymbiont-induced thelytoky in a parasitoid wasp. *BMC Evol Biol*  
574 15(1):84.
- 575 27. Dyson EA, Kamath MK, Hurst GDD (2002) *Wolbachia* infection associated  
576 with all-female broods in *Hypolimnas bolina* (Lepidoptera: Nymphalidae):  
577 evidence for horizontal transmission of a butterfly male killer. *Heredity*  
578 (*Edinb*) 88(3):166–71.
- 579 28. Harumoto T, Anbutsu H, Lemaitre B, Fukatsu T (2016) Male-killing  
580 symbiont damages host's dosage-compensated sex chromosome to  
581 induce embryonic apoptosis. *Nat Commun* 7:12781.
- 582 29. Yoshido A, Marec F, Sahara K (2016) The fate of W chromosomes in  
583 hybrids between wild silkmoths, *Samia cynthia* ssp.: no role in sex  
584 determination and reproduction. *Heredity (Edinb)* 116(5):424–433.
- 585 30. Rigaud T, Juchault P, Mocquard J-P (1997) The evolution of sex  
586 determination in isopod crustaceans. *BioEssays* 19(5):409–416.
- 587 31. Leclercq S, et al. (2016) Birth of a W sex chromosome by horizontal  
588 transfer of *Wolbachia* bacterial symbiont genome. *Proc Natl Acad Sci U S*  
589 *A* 113(52):201608979.
- 590 32. Hatcher MJ, Taneyhill DE, Dunn AM, Tofts C (1999) Population dynamics  
591 under parasitic sex ratio distortion. *Theor Pop Biol* 56(1):11–28.
- 592 33. Charlat S, et al. (2007) Extraordinary flux in sex ratio. *Science*  
593 317(5835):214.
- 594 34. Majerus TMO, Majerus MEN (2010) Intergenomic arms races: Detection of  
595 a nuclear rescue gene of male-killing in a ladybird. *PLoS Pathog* 6(7):1–7.

- 596 35. Braig HR, Zhou W, Dobson SL, O'Neill SL (1998) Cloning and  
597 characterization of a gene encoding the major surface protein of the  
598 bacterial endosymbiont *Wolbachia pipientis*. *J Bacteriol* 180(9):2373–  
599 2378.
- 600 36. Bolger AM, Lohse M, Usadel B (2014) Trimmomatic: A flexible trimmer for  
601 Illumina sequence data. *Bioinformatics* 30(15):2114–2120.
- 602 37. Langmead B, Salzberg SL (2012) Fast gapped-read alignment with Bowtie  
603 2. *Nat Meth* 9(4):357–359.
- 604 38. Simpson JT, Durbin R (2012) Efficient de novo assembly of large  
605 genomes using compressed data structures. *Genome Res* 22(3):549–556.
- 606 39. Suetsugu Y, et al. (2013) Large scale full-length cDNA sequencing reveals  
607 a unique genomic landscape in a lepidopteran model insect, *Bombyx mori*.  
608 *G3 Genes/Genomes/Genetics* 3(9):1481–1492.
- 609 40. Jiggins CD, et al. (2001) Sex-linked hybrid sterility in a butterfly. *Evolution*  
610 (N Y) 55(May 1998):1631–1638.
- 611 41. Sahara K, Marec F, Eickhoff U, Traut W (2003) Moth sex chromatin  
612 probed by comparative genomic hybridization (CGH). *Genome* 46:339–  
613 342.
- 614 42. Sahara K, et al. (2003) W-derived BAC probes as a new tool for  
615 identification of the W chromosome and its aberrations in *Bombyx mori*.  
616 *Chromosoma* 112(1):48–55.
- 617 43. Traut W, Marec F (1996) Sex chromatin in Lepidoptera. *Q Rev Biol*  
618 71(2):239–256.
- 619 44. Abe H, et al. (2008) Identification of the female-determining region of the  
620 W chromosome in *Bombyx mori*. *Genetica* 133(3):269–282.
- 621 45. Yoshido A, Sahara K, Yasukochi Y (2014) Chapter 6; Silkmoths  
622 (Lepidoptera). *Protocols for Cytogenetic Mapping of Arthropod Genomes.*,  
623 ed Sharakhov I (CRC Press, Boca Raton, U.S.A.), pp 219–256.
- 624 46. Sahara K, Marec F, Traut W (1999) TTAGG telomeric repeats in  
625 chromosomes of some insects and other arthropods. *Chromosom Res*  
626 7(6):449–460.

627 **Figure legends**

628 **Fig. 1.** Fluorescence *in-situ* hybridization and sequence read counts for a C  
629 female, C male, and CF female *E. mandarina*. A–C: Mitotic complements  
630 hybridized with a genomic probe (green; green arrows) and a Z-linked *Kettin*  
631 (*Ket*) probe (red; red arrows) in a C female (2n = 62) (A), C male (2n = 62) (B),  
632 and CF female (2n = 61) (C). D–I: Genomic *in situ* hybridization (GISH) and  
633 FISH with a Z-linked *Ket* probe performed on interphase nuclei of *E. mandarina*  
634 C females (D, E), C males (F, G), and CF females (H, I). J–L: GISH,  
635 telomere-FISH and FISH with *Ket* probe performed on pachytene complements  
636 of *E. mandarina* C females (G, n = 31), C males (H, n = 31), and CF females (I, n  
637 = 31). Green paint signals in A, E and J revealed that C females have the W  
638 chromosome. The *Ket* probe signals (red) appeared on the Z pairing to the W in  
639 C females (J), the ZZ bivalent in C males (K), and the Z univalent of CF females  
640 (L). The single signals were observed both in C and CF female nuclei. The  
641 signals in C females (J) and males (K) clearly showed their respective WZ and  
642 ZZ chromosome sets, and a ZO chromosome set in CF females (L). W: W  
643 chromosome; Z: Z chromosome; white arrows: *Wolbachia*-like structures. A bar  
644 represents 10  $\mu$ m. M–O: Relative normalized sequence read counts in CF  
645 females, C females, and C males for 67 contigs homologous to *Bombyx mori* loci  
646 on chromosome 1 (Z chromosome; M), 28 contigs homologous to *B. mori* loci on  
647 chromosome 4 (N), and 33 contigs homologous to *B. mori* loci on chromosome  
648 16 (O), with relative read counts set to 1 (males). Details about genome  
649 sequencing are provided in Materials and Methods.

650

651 **Fig. 2.** Effects of *wFem* on Z-linked gene dose in *E. mandarina* offspring. (A)  
652 Estimate of the gene dose of *Ket* (relative gene copies per copy of *EF-1 $\alpha$* ) by  
653 genomic quantitative polymerase chain reaction (qPCR) analysis in each of the  
654 fertilized eggs laid by C females, CF females, and tetracycline (tet)-treated CF  
655 females. Each colored circle represents a single fertilized egg. Sample sizes are  
656 given in parentheses. (B) Offspring sex ratio of five females tet-treated prior to  
657 oviposition and three non-treated CF females. Numbers to the left of the arrows  
658 represent duration (days) of tet treatment. (C) Estimate of the gene dose of *Ket*

659 (relative gene copies per copy of *EF-1 $\alpha$* ) by genomic qPCR in each of the adult  
660 offspring produced by CF females that were tet-treated during the adult stage  
661 (prior to oviposition). Each circle represents an adult offspring. Z chromosomes  
662 of these offspring individuals were genotyped as Z<sup>A</sup>, Z<sup>B</sup>, Z<sup>C</sup> or Z<sup>D</sup> on the basis of  
663 intron nucleotide sequence of Z-linked *Tpi*. The green arrow points to a male  
664 individual (adult) whose karyotype was considered to be ZO but possibly ZZ'  
665 (see text for details). f: female, m: male. (D) Estimate of the gene dose of *Ket*  
666 (relative gene copies per copy of *EF-1 $\alpha$* ) by genomic qPCR in each of the  
667 intersexual adults generated by treating CF larvae with tet.

668

669 **Fig. 3.** Effects of *wFem* on splicing of the *doublesex* gene in *E. mandarina*. (A)  
670 Reverse-transcription polymerase chain reaction (RT-PCR) products of *E.*  
671 *mandarina doublesex* (*Emdsx*) run on an agarose gel. Lane 1: C female; lane 2:  
672 C male; lanes 3 and 4: CF females; lanes 5 and 6: intersexes generated by  
673 tetracycline (tet) treatment of larvae produced by CF females; lane 7: 100-bp  
674 ladder. Females have at least seven splicing products, whereas males have a  
675 single product. (B) Structures of the splicing products of *Emdsx*. Translated  
676 regions are indicated by red and blue bars, untranslated regions by gray bars,  
677 and stop codons by triangles. Numbers of clones obtained by cloning the  
678 RT-PCR products are shown in the table on the right. C–H: color and  
679 morphology of forewings. Females are pale yellow on the dorsal side of the  
680 forewings (C) and do not have sex brand on the ventral side of the forewings (F),  
681 while males are intense yellow on the dorsal side of the forewings (D) and have  
682 sex brand on the ventral side of the forewings (G). Many of the intersexes  
683 generated by tet-treating CF larvae are strong yellow on the dorsal side of the  
684 forewings (E) and have faint sex brand on the ventral side of the forewings (H).

685  
686 **Fig. 4.** Schematic illustration of two alternative mechanistic models of meiotic  
687 drive that explain the observed data. (A) The “Selection of O gametes” model  
688 assumes that Z-bearing gametes are selected against during meiosis. (B) The  
689 “Elimination of maternal Z” model assumes that Z chromosomes are eliminated  
690 during or after normal meiosis.

691

692 **Fig. 5.** (A) All-female production explained by *Wolbachia*–host interaction.  
693 Effects of *wFem* on the development and sex determination of *E. mandarina*,  
694 and outcomes of larval versus adult tet treatment are illustrated. Asterisk: The  
695 majority of ZO males die, but a few survived. (B) Hypothetical evolutionary  
696 trajectory of *Wolbachia*–host interaction. See Discussion for details.



Fig. 1

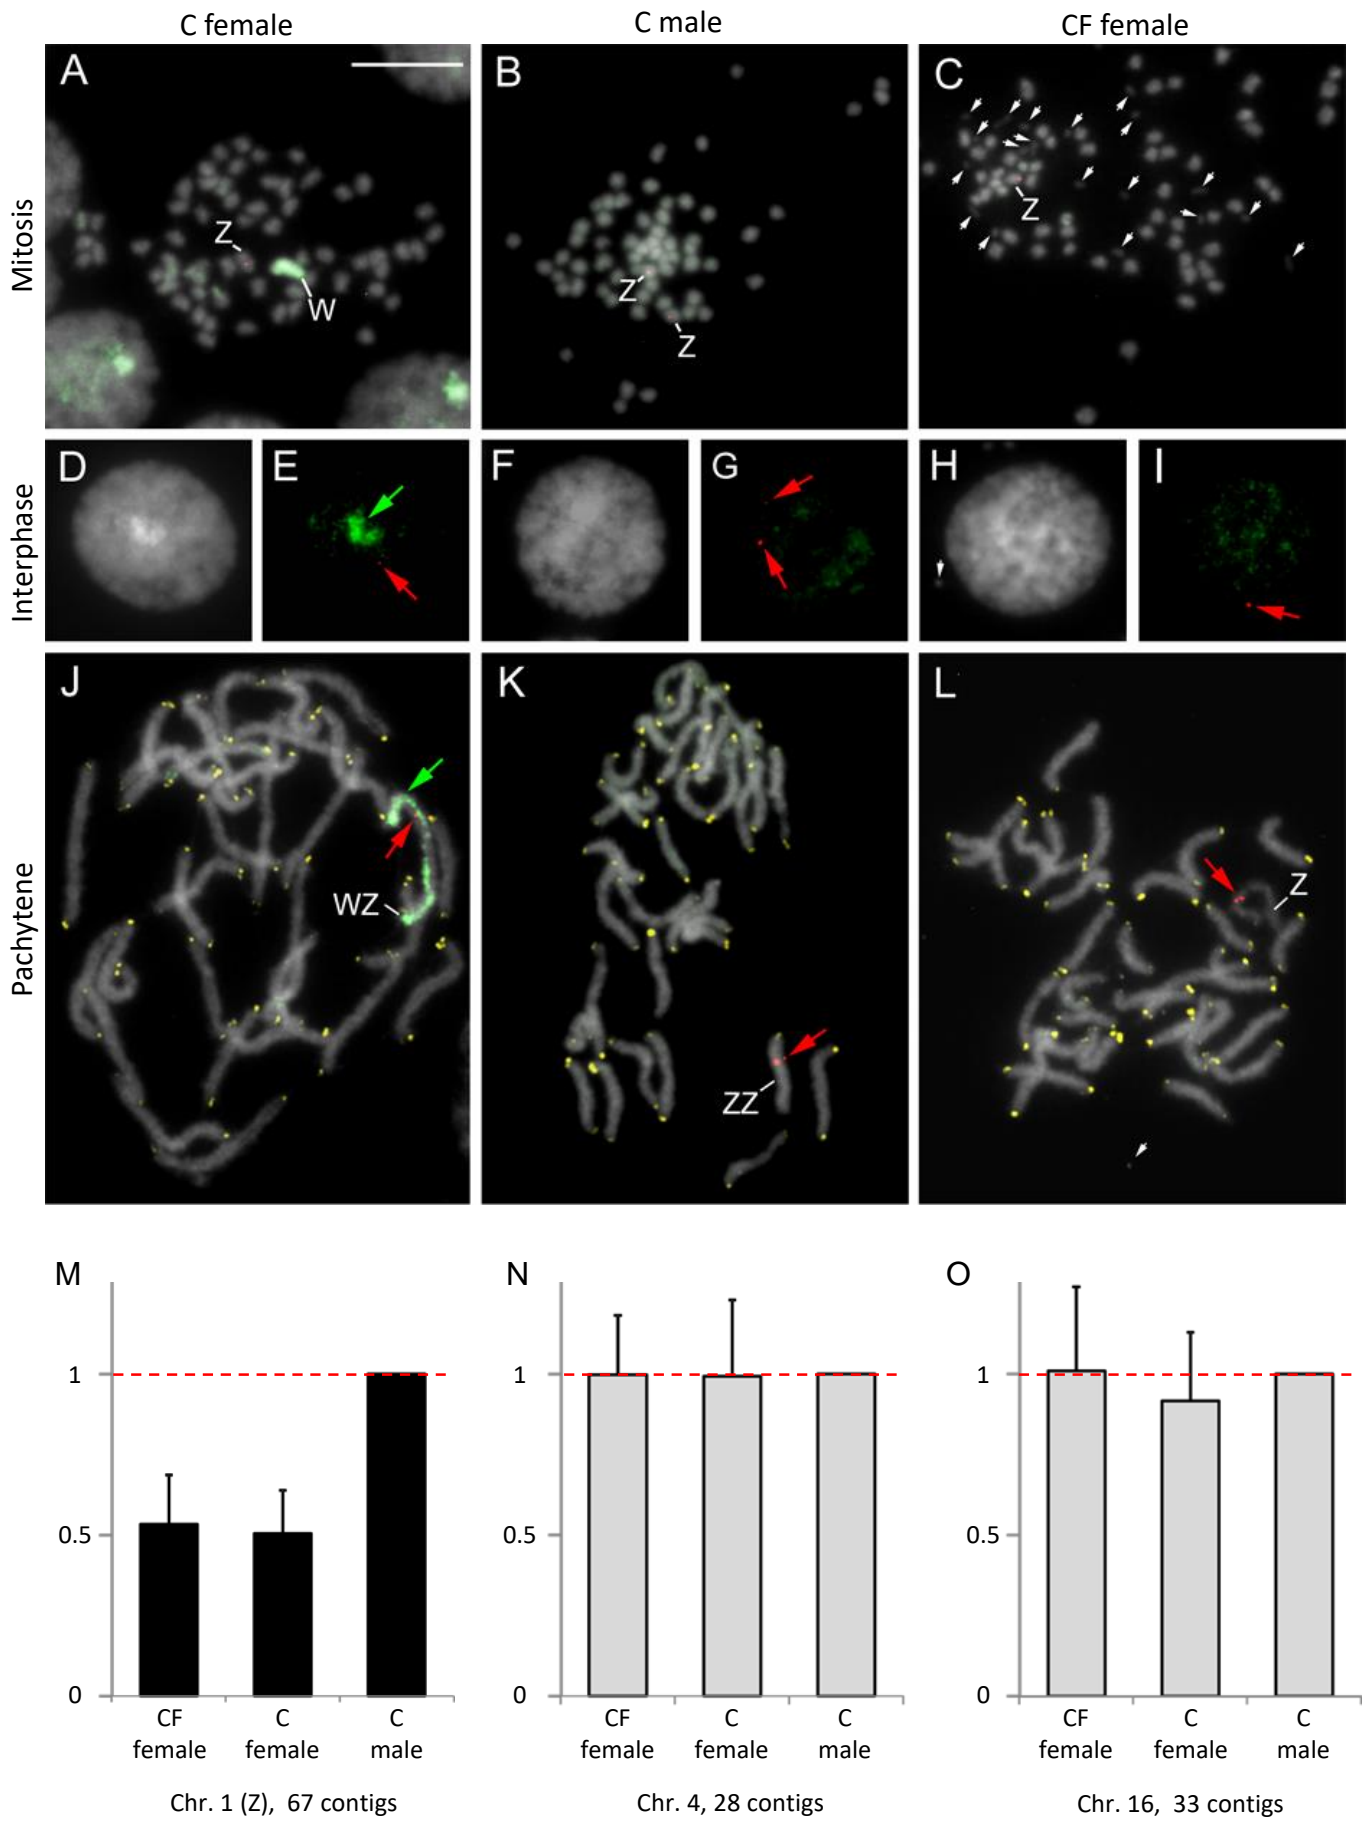

Fig. 2

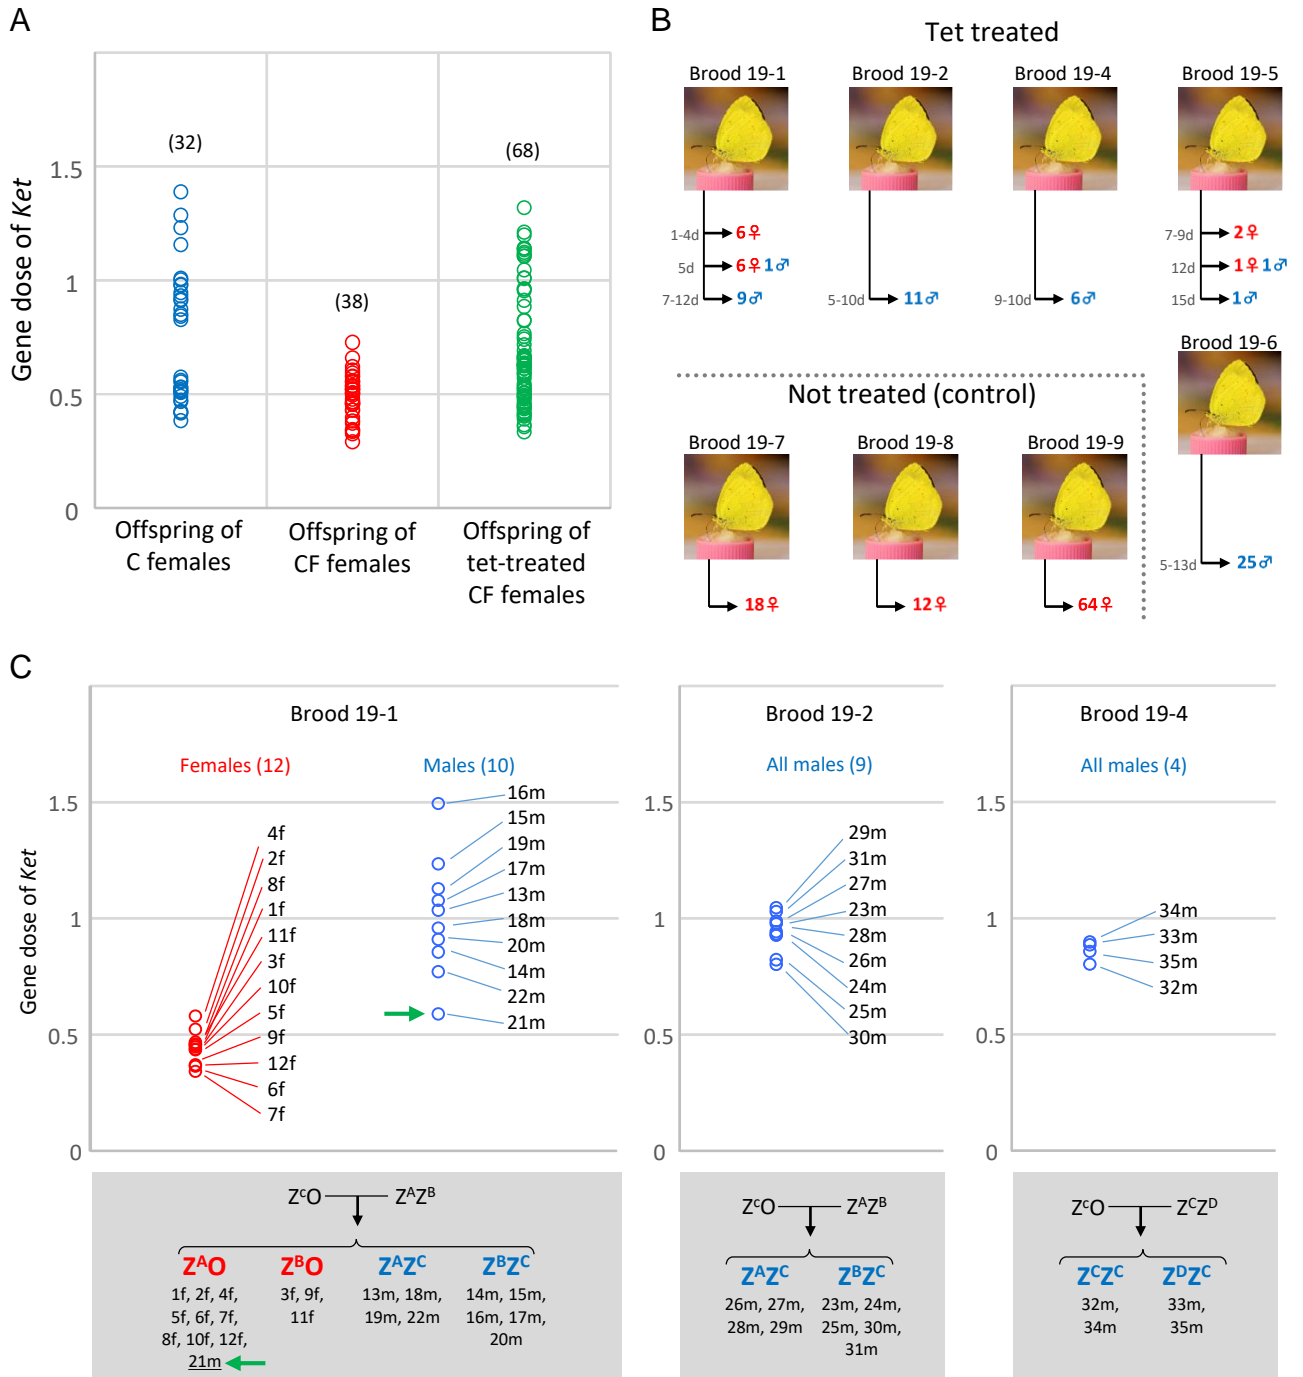

Fig. 3

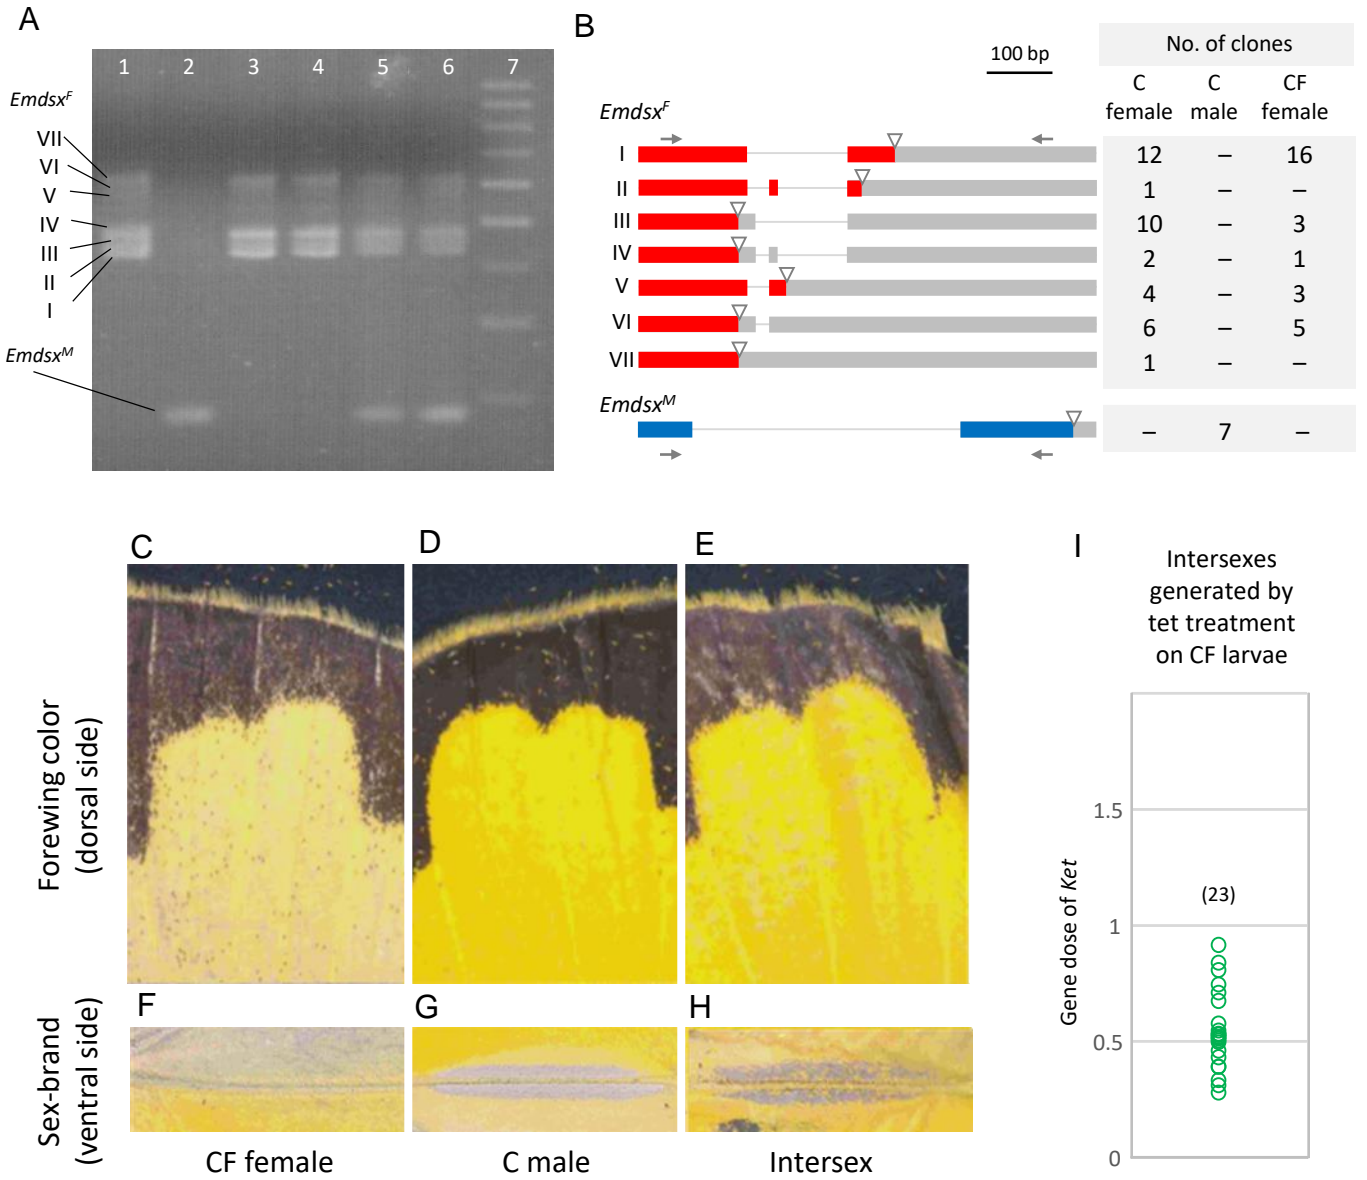

Fig. 4

A

Selection of O gametes

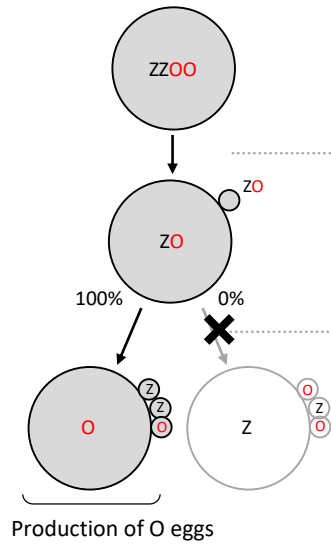

B

Elimination of maternal Z

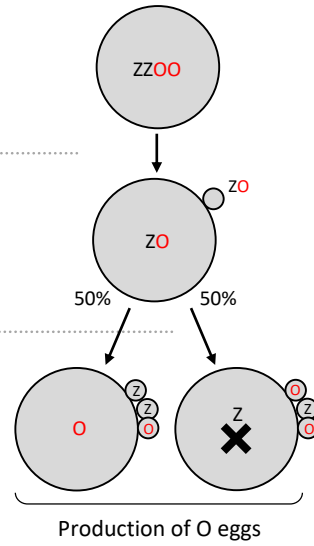

Fig. 5

**A All-female production explained by *Wolbachia*-host interaction**

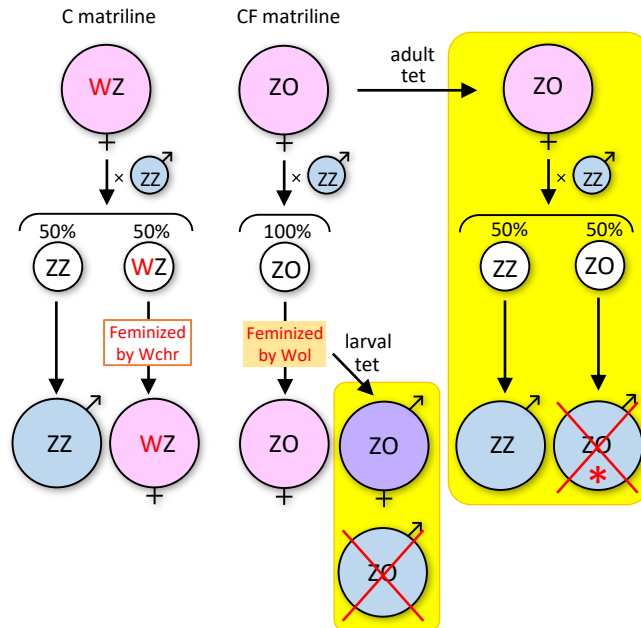

**B Hypothetical evolutionary trajectory of *Wolbachia*-host interaction**

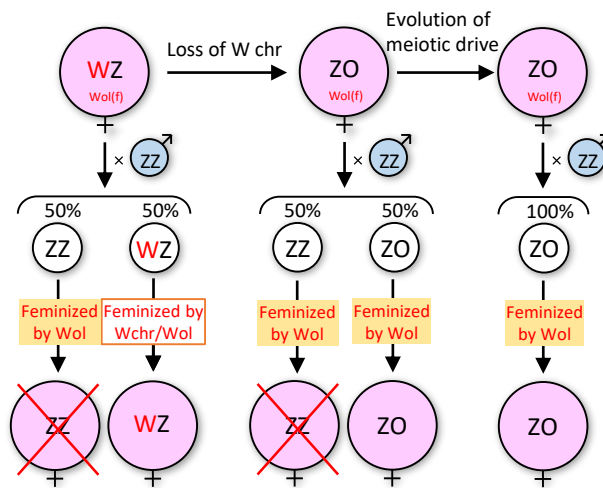

**Table 1. Detection of *Emdsx* in adults that were tet-treated during various larval stages**

| Presence of <i>Emdsx</i> transcripts                       | Offspring of CF females |                 |                 |                 |                 | Offspring of C females |
|------------------------------------------------------------|-------------------------|-----------------|-----------------|-----------------|-----------------|------------------------|
|                                                            | Non-treated             | 4th-5th treated | 3rd-5th treated | 2nd-5th treated | 1st-5th treated | Non-treated            |
| <i>Emdsx<sup>F</sup></i> only                              | 46                      | 0               | 0               | 0               | 0               | 12                     |
| Both <i>Emdsx<sup>F</sup></i> and <i>Emdsx<sup>M</sup></i> | 1                       | 4(1)            | 19(7)           | 0               | 6(3)*           | 0                      |
| <i>Emdsx<sup>M</sup></i> only                              | 0                       | 0               | 1(1)            | 2(2)            | 0               | 12                     |
| Total                                                      | 47                      | 4(1)            | 20(8)           | 2(2)            | 6(3)            | 24                     |

The numbers of adults that failed to emerge from their pupal cases are in parentheses. \*Signals for *Emdsx<sup>F</sup>* were faint.
